# Supplementary material
Source: publisher figshare collection journal article supplement (https://acs.figshare.com/ndownloader/files/20099936)
Supplement: Supplementary file 1 [file 20099936]

## Supporting Information for:

# Solvent-Free Synthesis and Thin-Film Deposition of Cesium Copper Halides with Bright Blue Photoluminescence

Paz Sebastia-Luna, Javier Navarro-Alapont, Michele Sessolo, Francisco Palazon,\* and Henk J. Bolink

Instituto de Ciencia Molecular, ICMol, Universidad de Valencia, C/ Catedrático J. Beltrán 2, 46980 Paterna, Spain

**Table S 1.** Lattice parameters derived from Le Bail fits of  $\text{CsCu}_2\text{X}_3$  compounds (space group = Cmcm).

| <b>X</b>                              | <b>a (Å)</b> | <b>b (Å)</b> | <b>c (Å)</b> | <b><math>\alpha</math> (°)</b> | <b><math>\beta</math> (°)</b> | <b><math>\gamma</math> (°)</b> | <b>V (Å<sup>3</sup>)</b> |
|---------------------------------------|--------------|--------------|--------------|--------------------------------|-------------------------------|--------------------------------|--------------------------|
| <b>I</b>                              | 10.50438     | 13.11778     | 6.08282      | 90                             | 90                            | 90                             | 838                      |
| <b>I<sub>75</sub>Br<sub>25</sub></b>  | 10.47270     | 13.14974     | 6.06720      | 90                             | 90                            | 90                             | 836                      |
| <b>I<sub>50</sub>Br<sub>50</sub></b>  | 10.00890     | 12.91363     | 5.98059      | 90                             | 90                            | 90                             | 773                      |
| <b>I<sub>25</sub>Br<sub>75</sub></b>  | 9.78000      | 12.67451     | 5.91661      | 90                             | 90                            | 90                             | 733                      |
| <b>Br</b>                             | 9.87500      | 12.35396     | 5.81609      | 90                             | 90                            | 90                             | 710                      |
| <b>Cl<sub>25</sub>Br<sub>75</sub></b> | 9.73313      | 12.29817     | 5.77289      | 90                             | 90                            | 90                             | 691                      |
| <b>Cl<sub>50</sub>Br<sub>50</sub></b> | 9.58554      | 12.19961     | 5.71844      | 90                             | 90                            | 90                             | 669                      |
| <b>Cl<sub>75</sub>Br<sub>25</sub></b> | 9.47997      | 12.09300     | 5.67565      | 90                             | 90                            | 90                             | 651                      |
| <b>Cl</b>                             | 9.50509      | 11.89780     | 5.59920      | 90                             | 90                            | 90                             | 633                      |

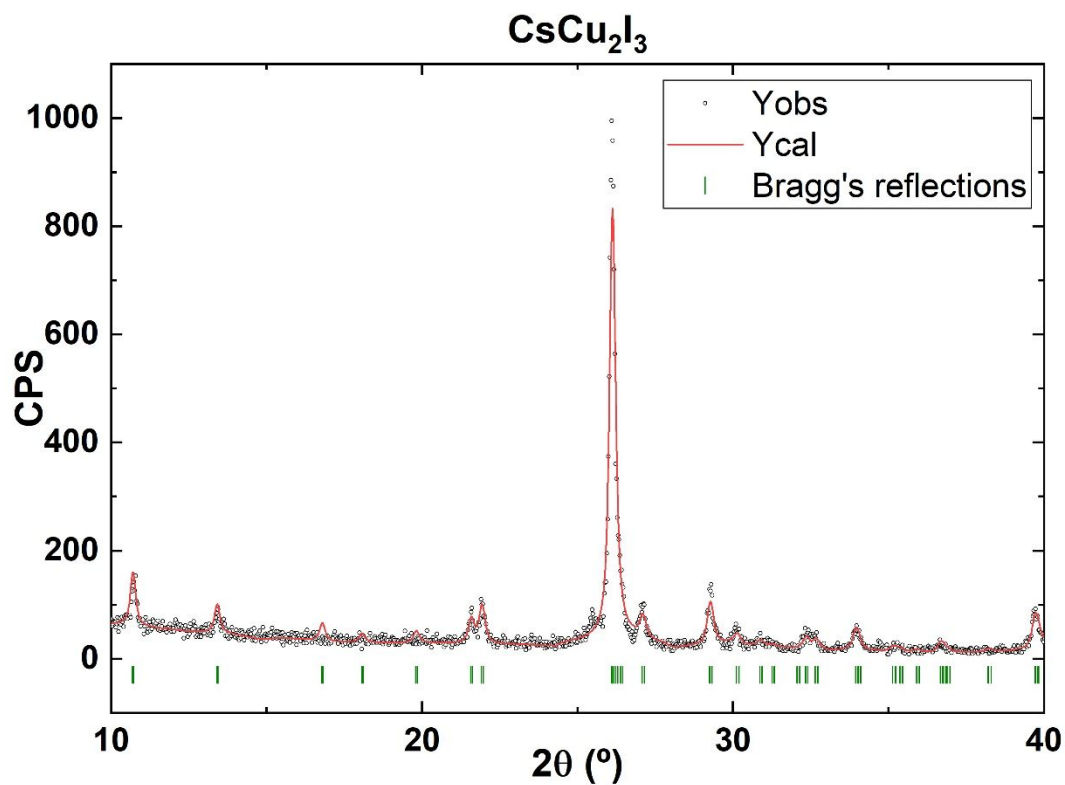

**Figure S 1.** Experimental (open circles) and fitted (red line) diffractograms. Calculated Bragg's reflections position in green. Compound given in title.

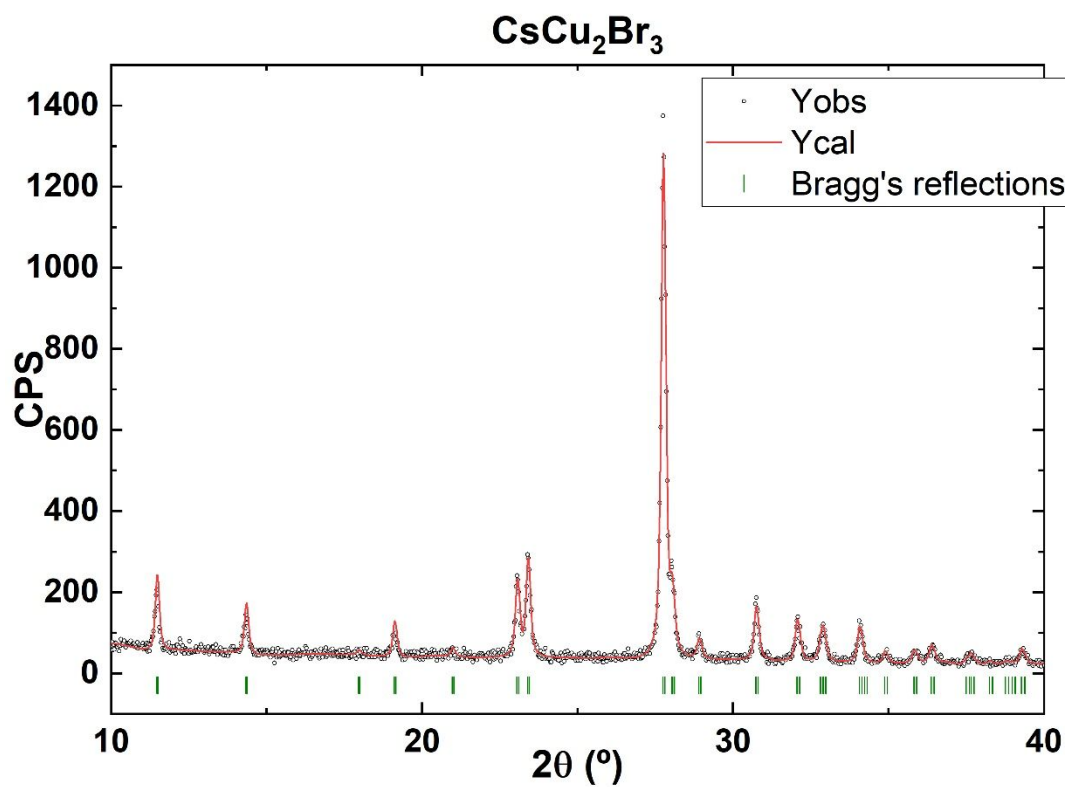

**Figure S 2.** Experimental (open circles) and fitted (red line) diffractograms. Calculated Bragg's reflections position in green. Compound given in title.

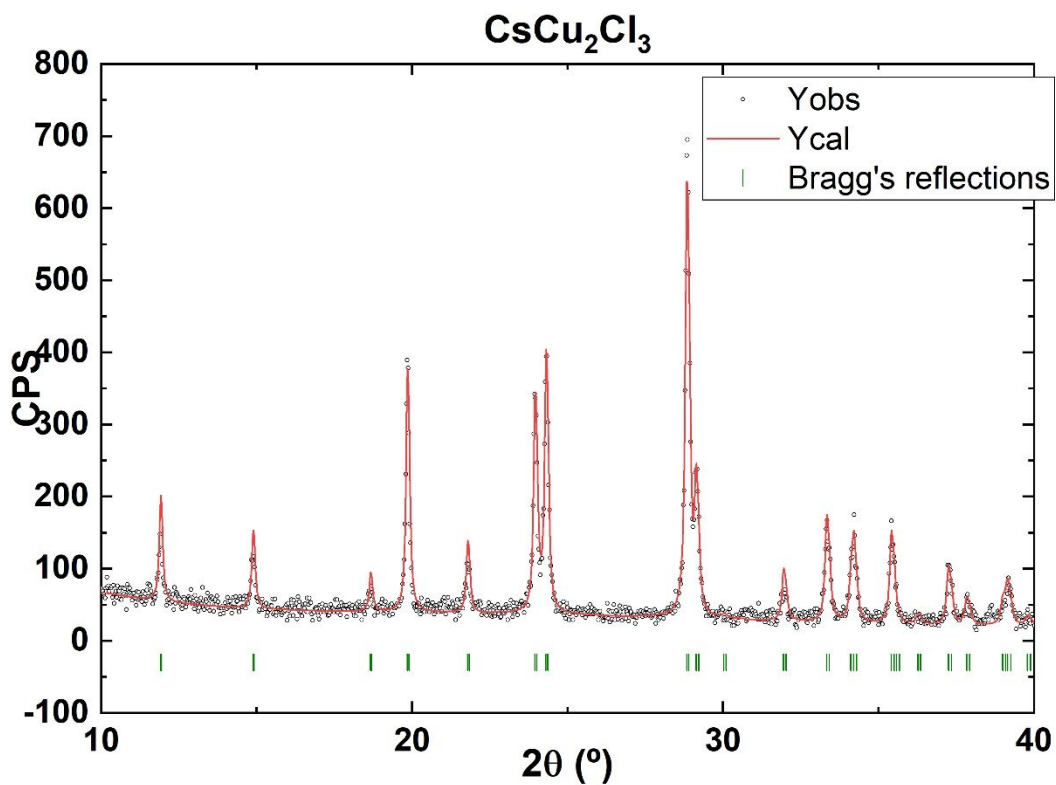

Figure S 3. Experimental (open circles) and fitted (red line) diffractograms. Calculated Bragg's reflections position in green.  
Compound given in title.

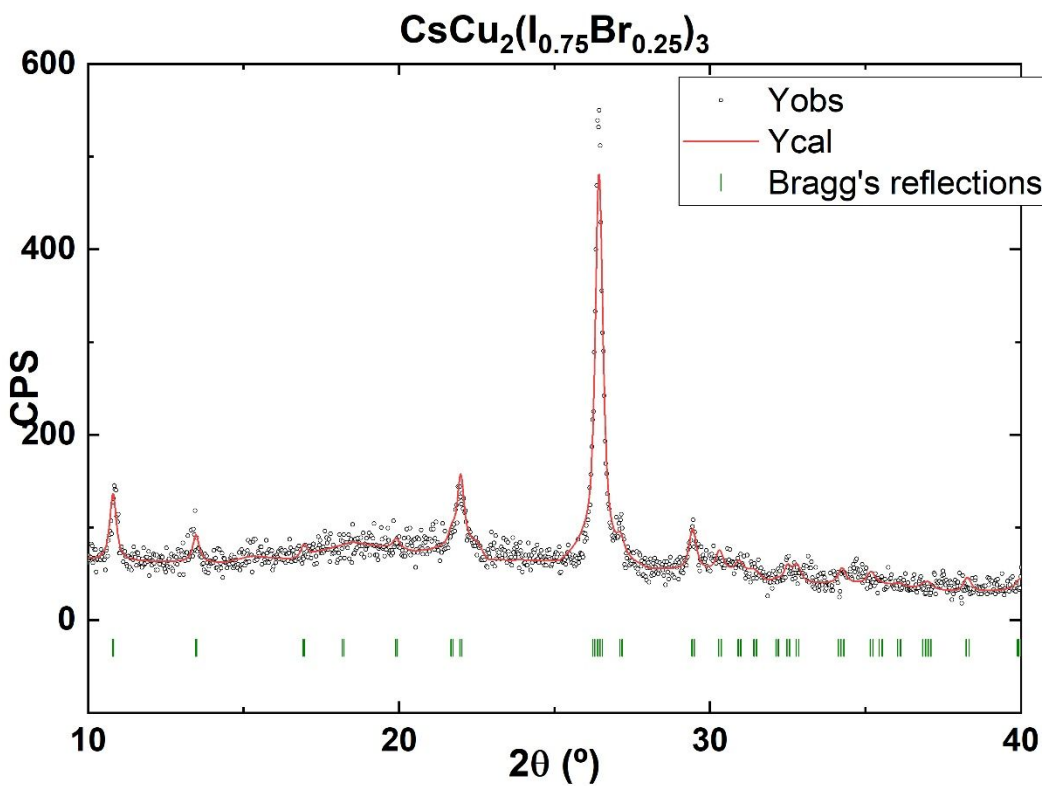

Figure S 4. Experimental (open circles) and fitted (red line) diffractograms. Calculated Bragg's reflections position in green.  
Compound given in title.

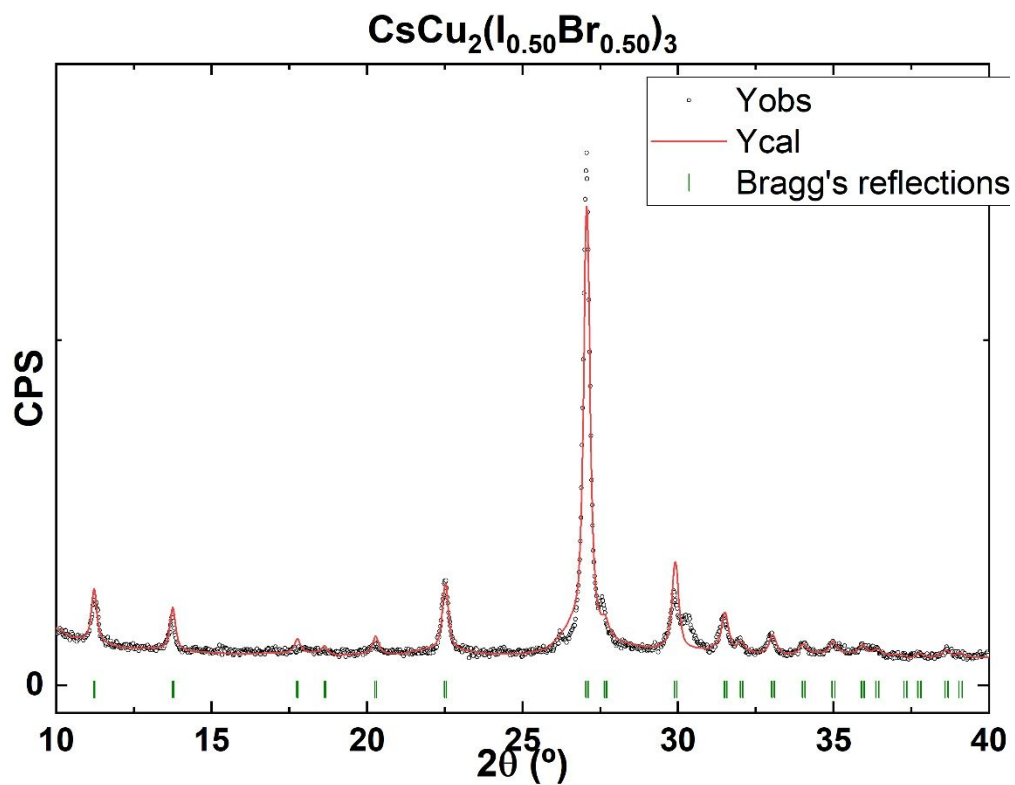

Figure S 5. Experimental (open circles) and fitted (red line) diffractograms. Calculated Bragg's reflections position in green.  
Compound given in title.

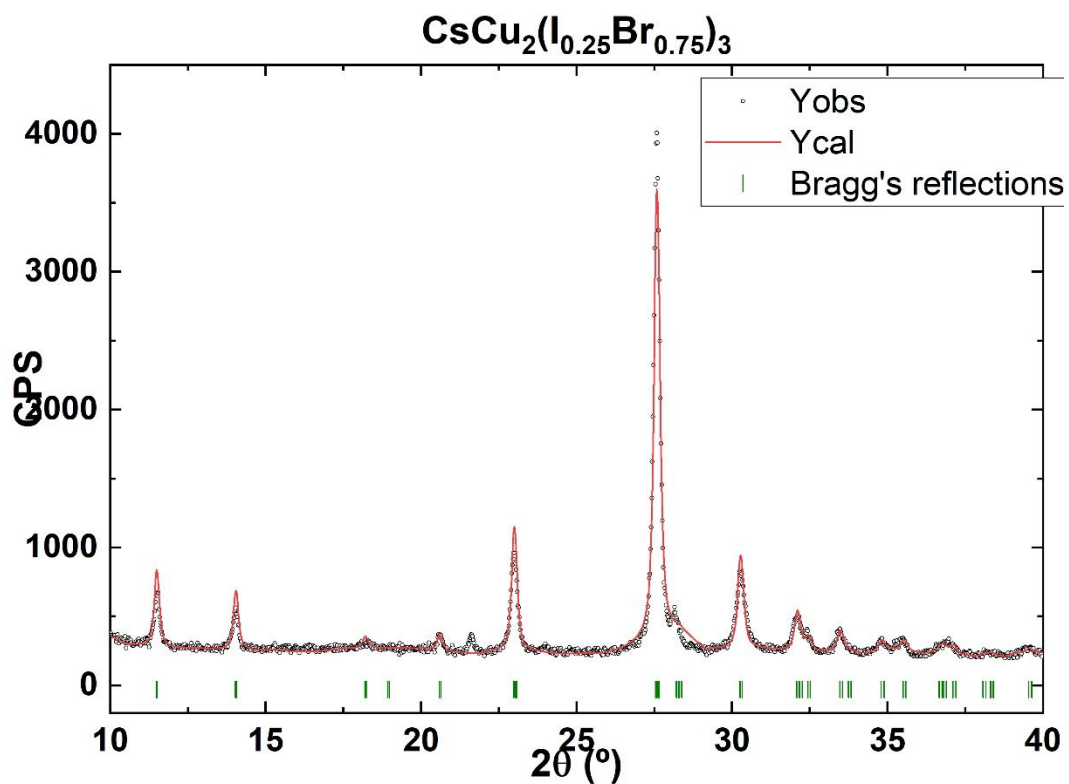

Figure S 6. Experimental (open circles) and fitted (red line) diffractograms. Calculated Bragg's reflections position in green.  
Compound given in title.

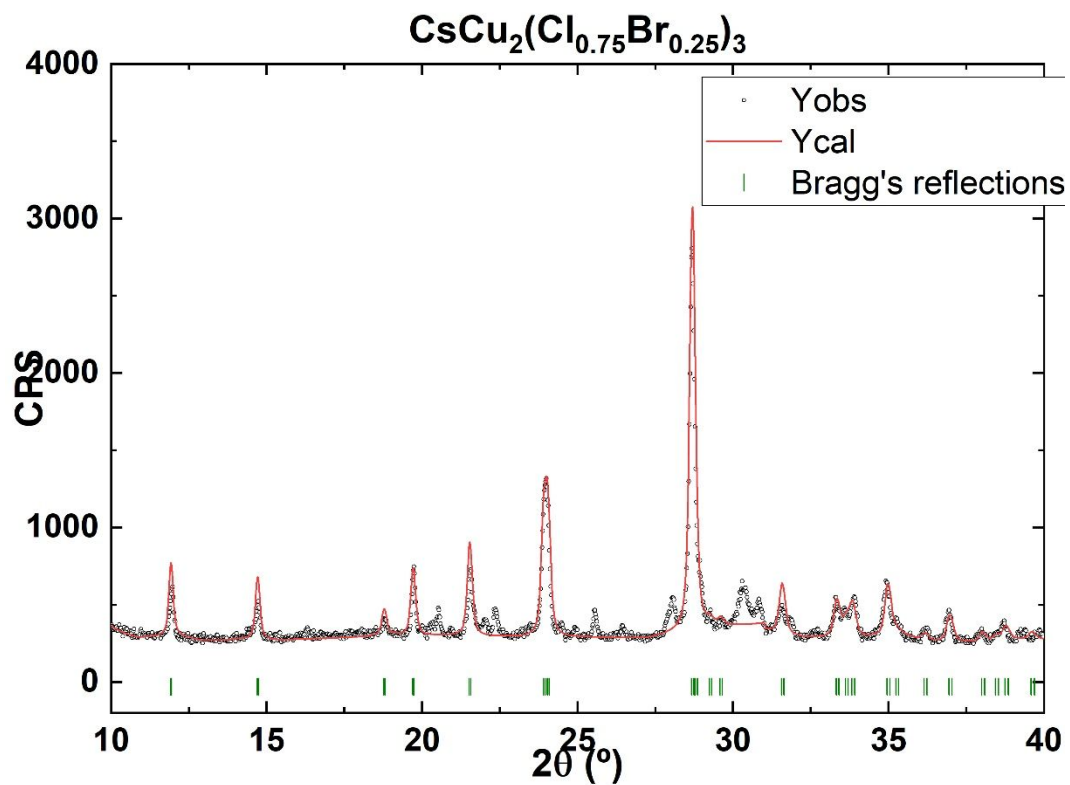

Figure S 7. Experimental (open circles) and fitted (red line) diffractograms. Calculated Bragg's reflections position in green.  
Compound given in title.

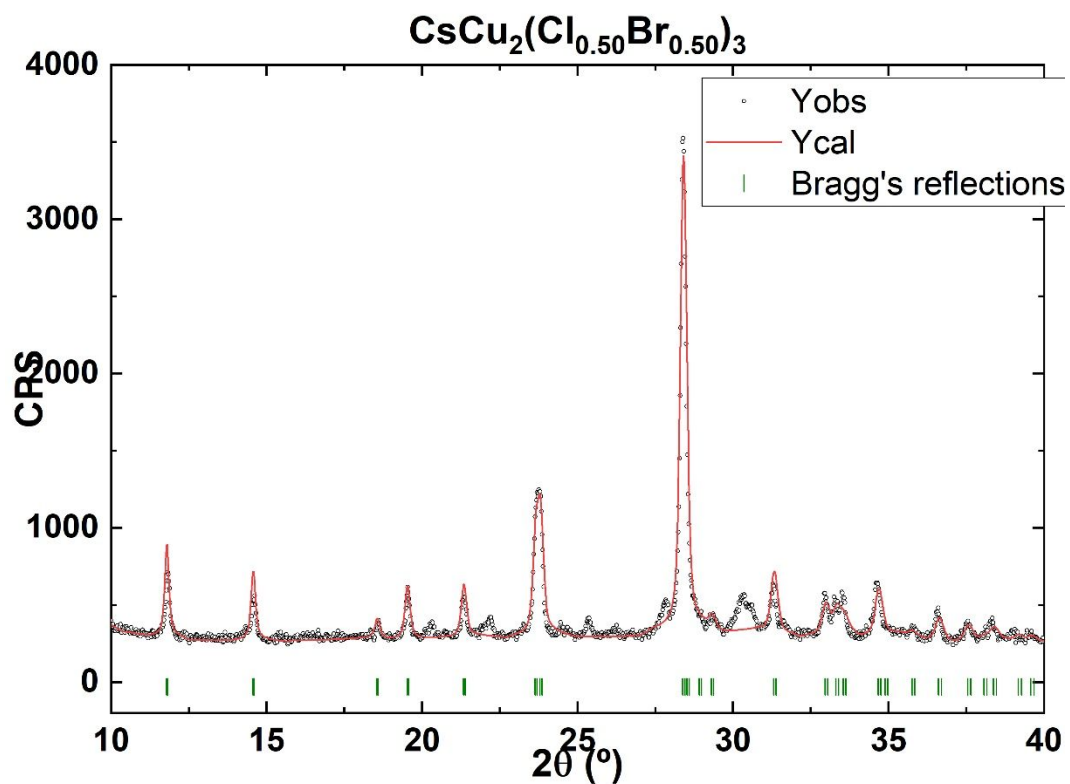

Figure S 8. Experimental (open circles) and fitted (red line) diffractograms. Calculated Bragg's reflections position in green.  
Compound given in title.

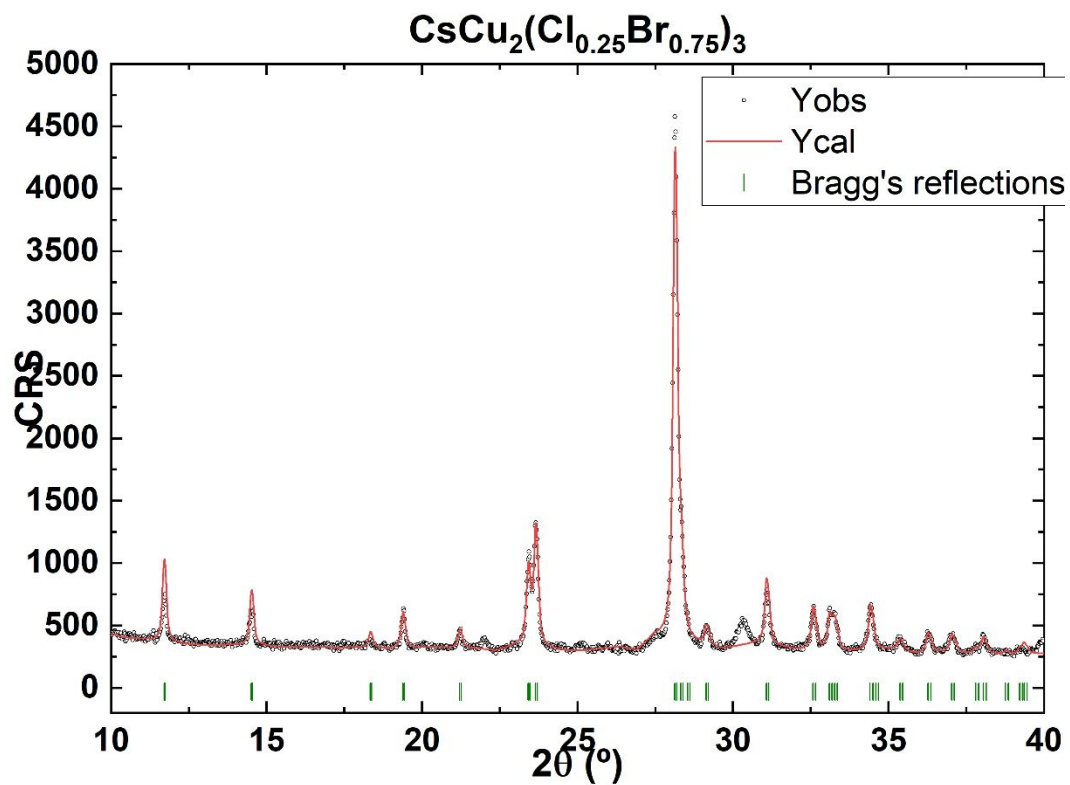

Figure S 9. Experimental (open circles) and fitted (red line) diffractograms. Calculated Bragg's reflections position in green. Compound given in title.

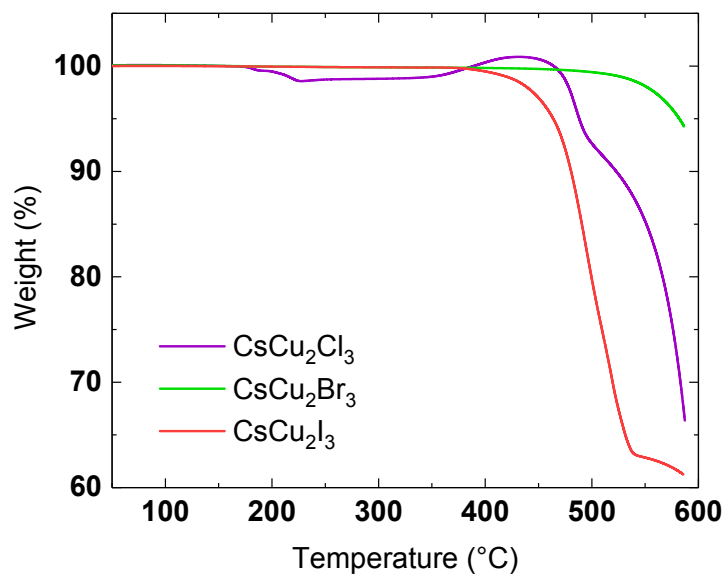

**Figure S 10.** Thermogravimetric analysis (TGA) of the pure-halide  $\text{CsCu}_2\text{X}_3$  compounds.

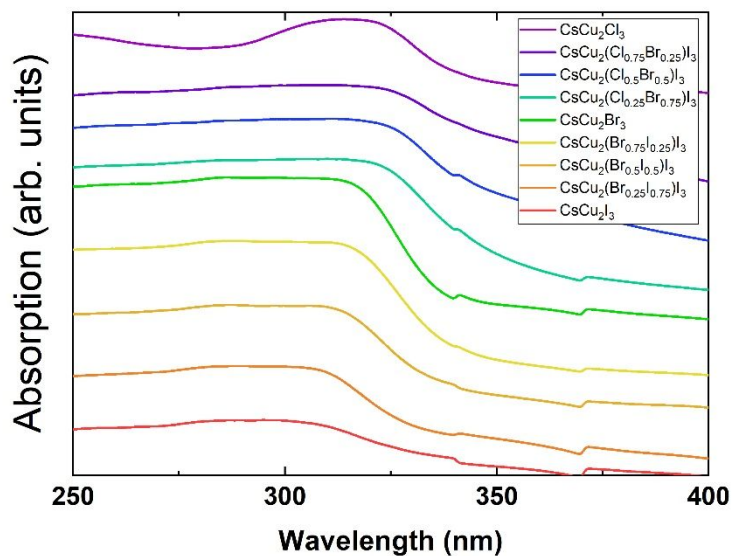

**Figure S 11.** Normalized absorbance spectra of powders of all  $\text{CsCu}_2\text{X}_3$  compounds.

**Table S 2.** Lattice parameters derived from Le Bail fits of  $\text{Cs}_3\text{Cu}_2\text{X}_5$  compounds (space group =  $\text{Pnma}$  for all compounds except for  $\text{Cs}_3\text{Cu}_2\text{X}_5$  for which  $\text{Cmcm}$  is assumed).

| <b>X</b>                              | <b>a (Å)</b> | <b>b (Å)</b> | <b>c (Å)</b> | <b><math>\alpha</math> (°)</b> | <b><math>\beta</math> (°)</b> | <b><math>\gamma</math> (°)</b> | <b>V (Å<sup>3</sup>)</b> |
|---------------------------------------|--------------|--------------|--------------|--------------------------------|-------------------------------|--------------------------------|--------------------------|
| <b>I</b>                              | 10.16984     | 11.64503     | 14.36164     | 90                             | 90                            | 90                             | 1701                     |
| <b>I<sub>75</sub>Br<sub>25</sub></b>  | 9.61720      | 11.02493     | 13.66381     | 90                             | 90                            | 90                             | 1634                     |
| <b>I<sub>50</sub>Br<sub>50</sub></b>  | 9.81536      | 11.32985     | 14.00074     | 90                             | 90                            | 90                             | 1557                     |
| <b>I<sub>25</sub>Br<sub>75</sub></b>  | 9.70827      | 11.10062     | 13.70945     | 90                             | 90                            | 90                             | 1477                     |
| <b>Br</b>                             | 9.56618      | 10.92152     | 13.57964     | 90                             | 90                            | 90                             | 1419                     |
| <b>Cl<sub>25</sub>Br<sub>75</sub></b> | 9.41863      | 10.79131     | 13.42943     | 90                             | 90                            | 90                             | 1364                     |
| <b>Cl<sub>50</sub>Br<sub>50</sub></b> | 9.35090      | 10.68736     | 13.27232     | 90                             | 90                            | 90                             | 1326                     |
| <b>Cl<sub>75</sub>Br<sub>25</sub></b> | 9.28622      | 10.59379     | 13.22188     | 90                             | 90                            | 90                             | 1300                     |
| <b>Cl</b>                             | 15.42572     | 8.74765      | 8.67929      | 90                             | 90                            | 90                             | 1171                     |

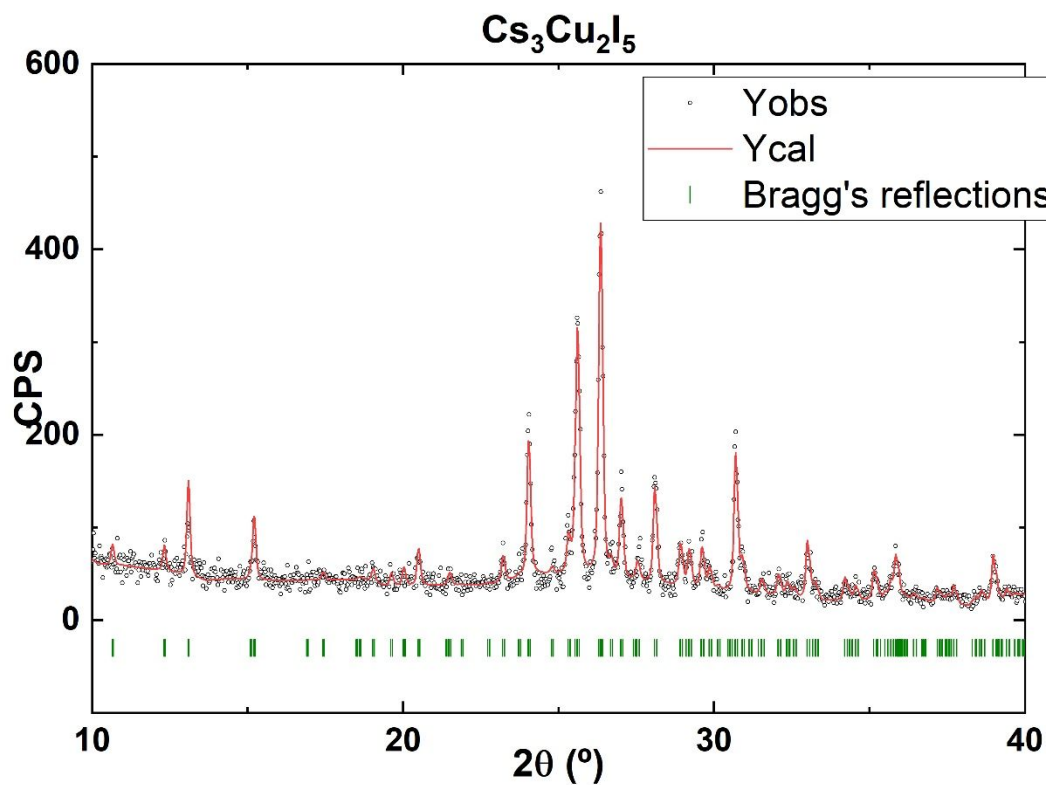

Figure S 12. Experimental (open circles) and fitted (red line) diffractograms. Calculated Bragg's reflections position in green. Compound given in title.

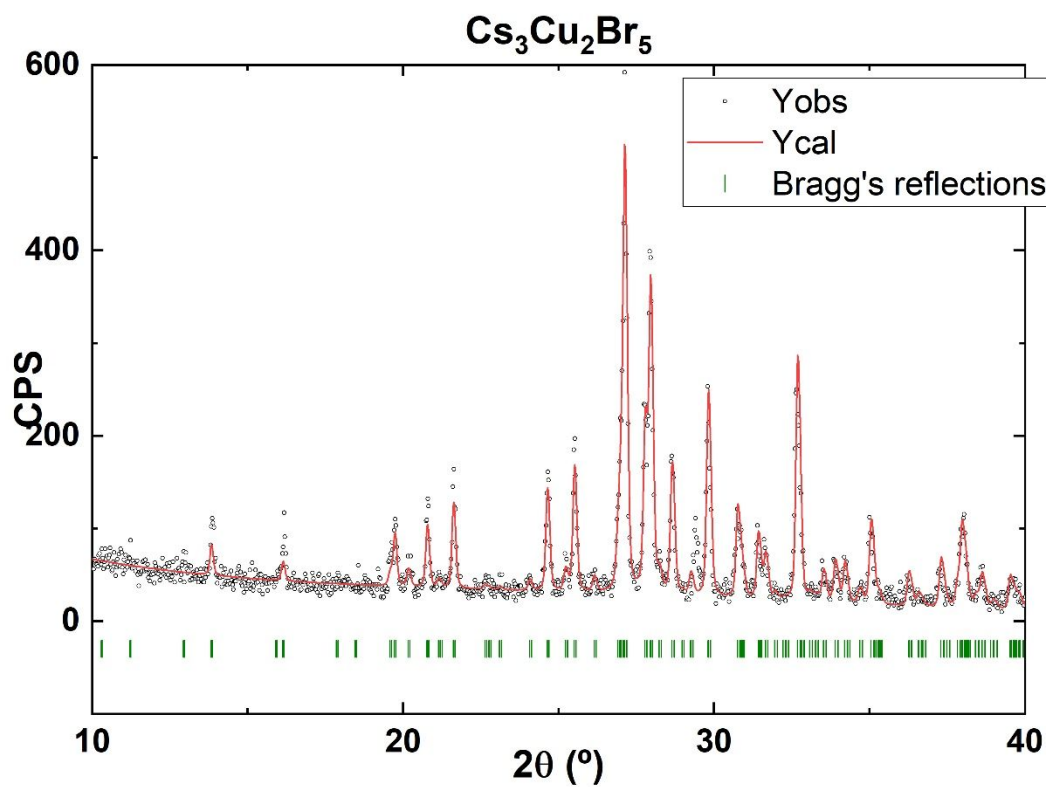

Figure S 13. Experimental (open circles) and fitted (red line) diffractograms. Calculated Bragg's reflections position in green. Compound given in title.

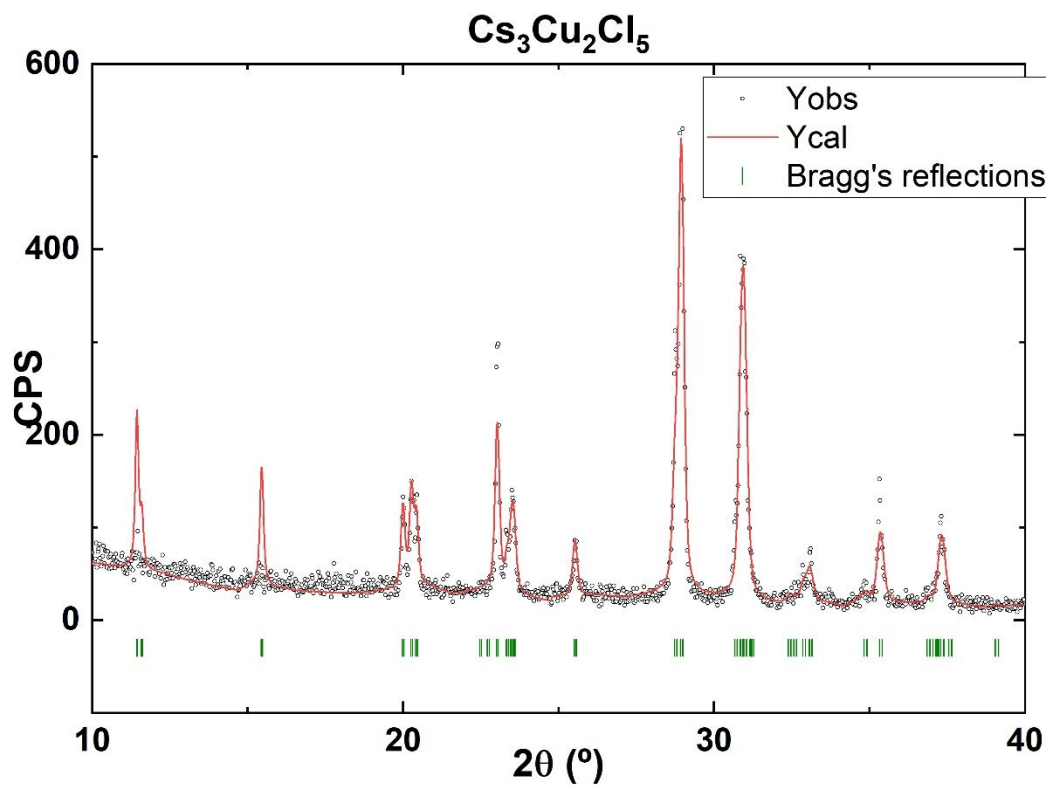

Figure S 14. Experimental (open circles) and fitted (red line) diffractograms. Calculated Bragg's reflections position in green. Compound given in title.

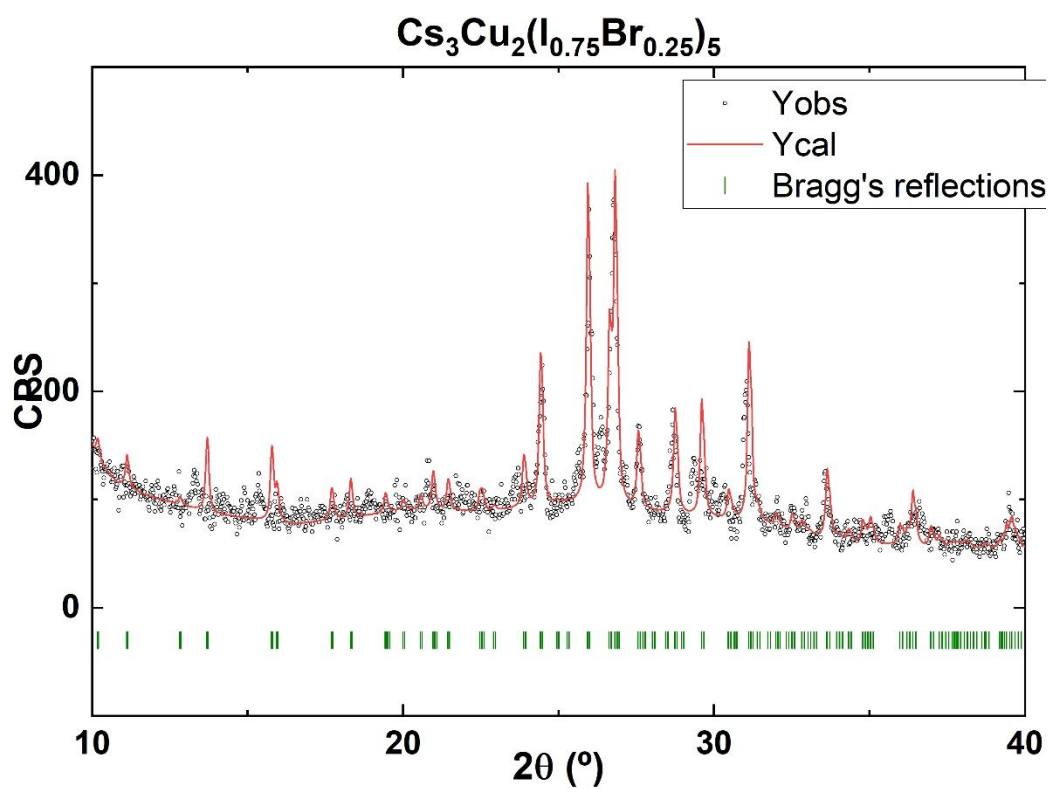

Figure S 15. Experimental (open circles) and fitted (red line) diffractograms. Calculated Bragg's reflections position in green. Compound given in title.

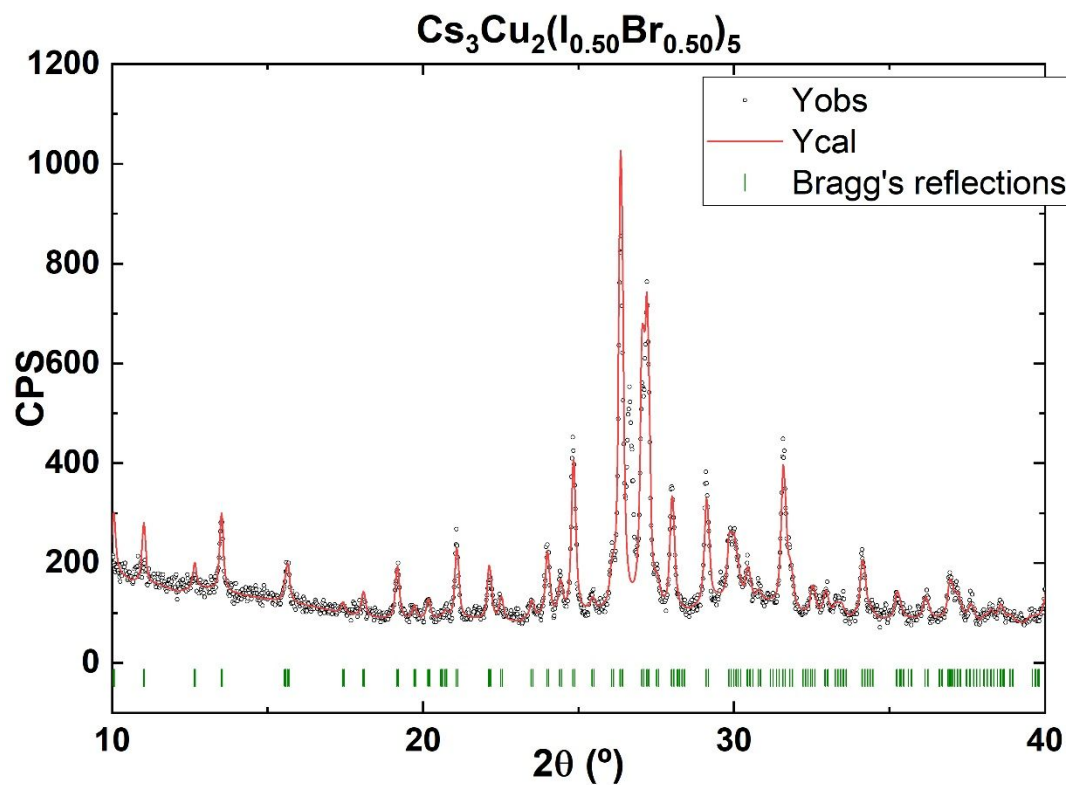

Figure S 16. Experimental (open circles) and fitted (red line) diffractograms. Calculated Bragg's reflections position in green. Compound given in title.

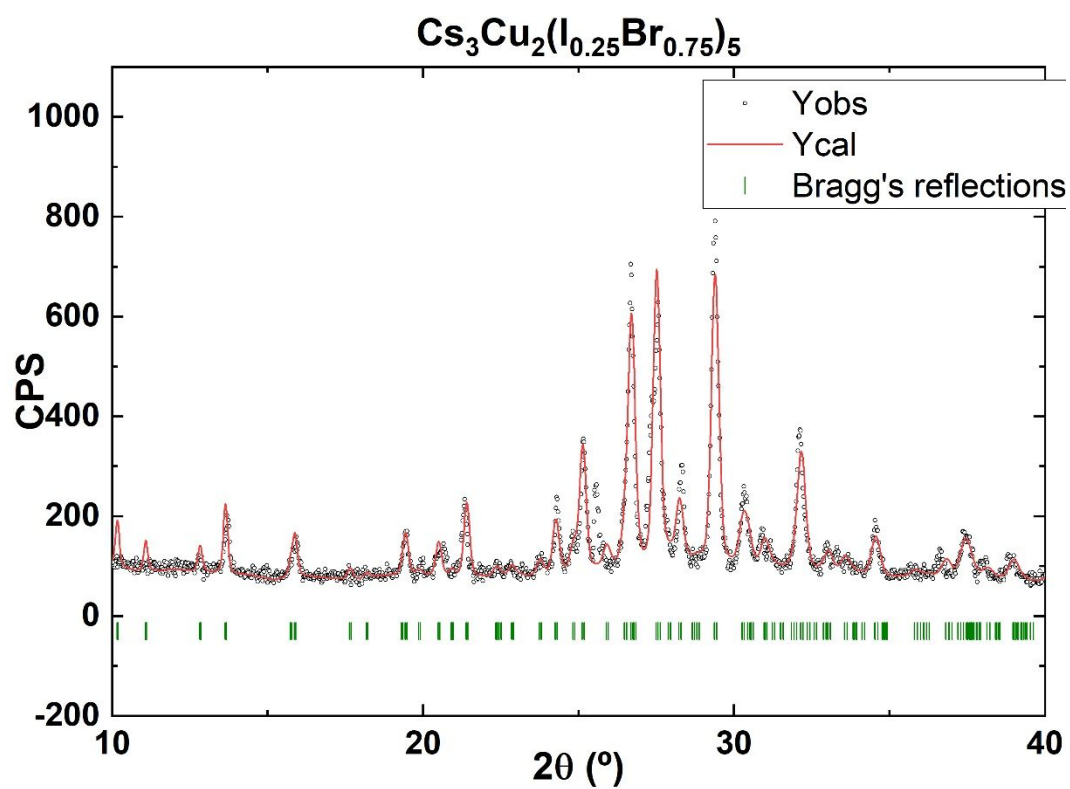

Figure S 17. Experimental (open circles) and fitted (red line) diffractograms. Calculated Bragg's reflections position in green. Compound given in title.

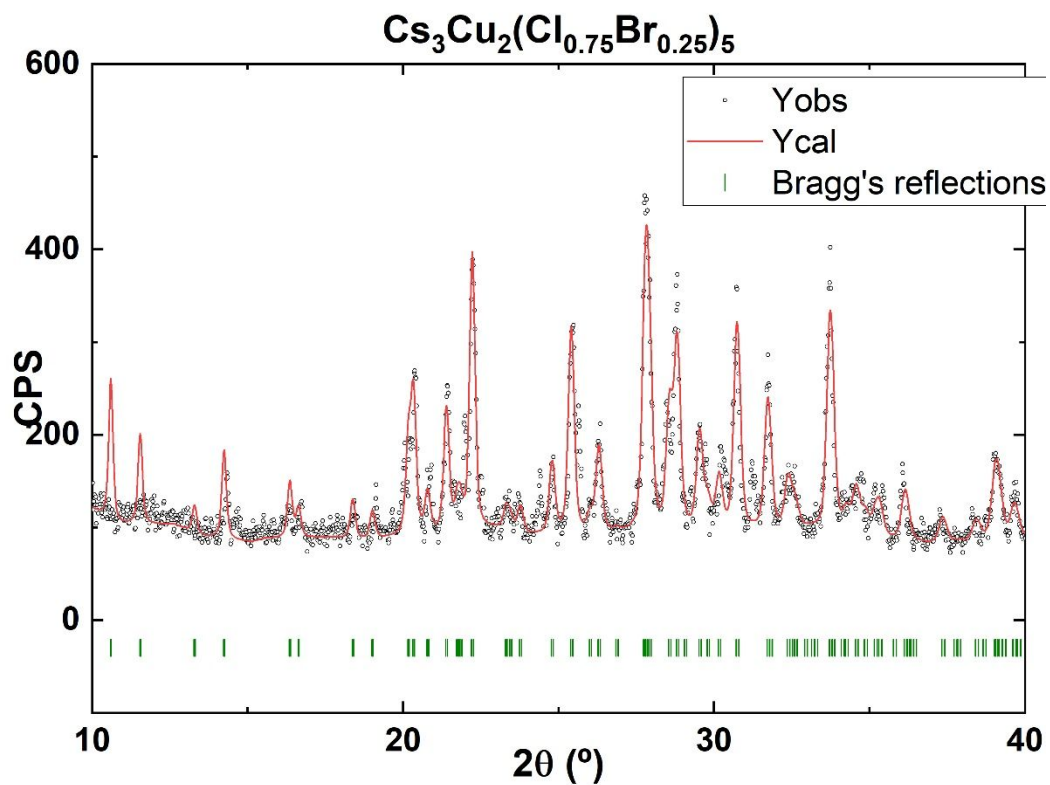

Figure S 18. Experimental (open circles) and fitted (red line) diffractograms. Calculated Bragg's reflections position in green. Compound given in title.

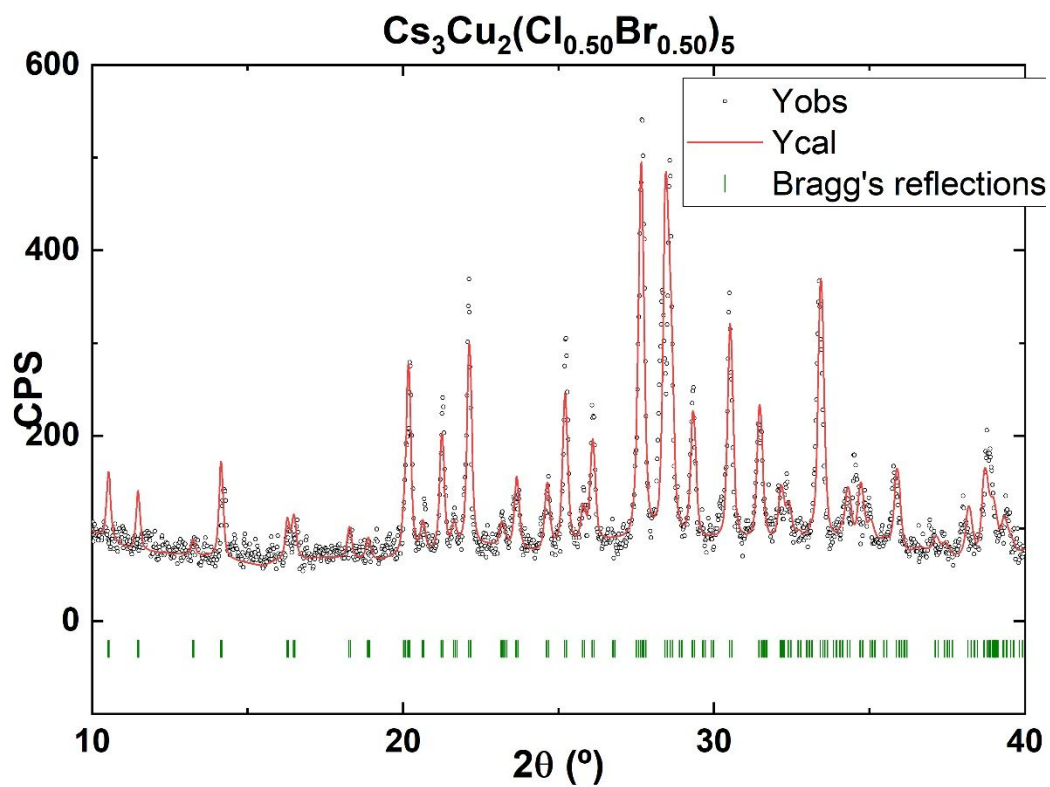

Figure S 19. Experimental (open circles) and fitted (red line) diffractograms. Calculated Bragg's reflections position in green. Compound given in title.

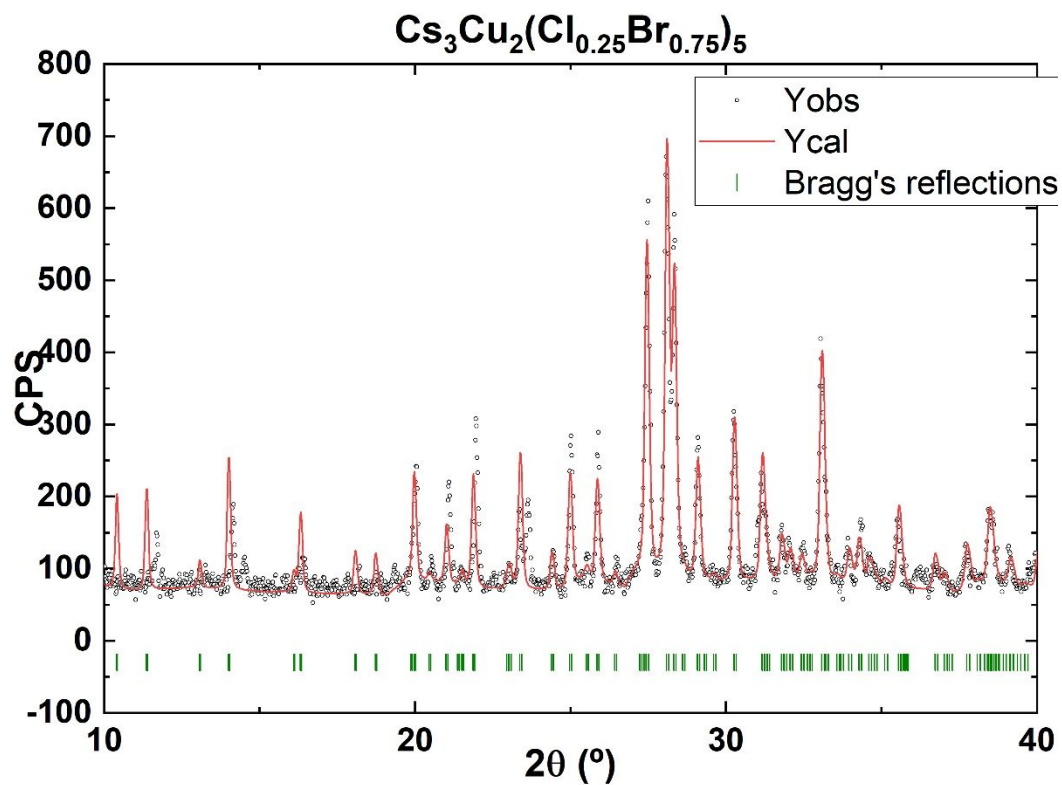

Figure S 20. Experimental (open circles) and fitted (red line) diffractograms. Calculated Bragg's reflections position in green. Compound given in title.

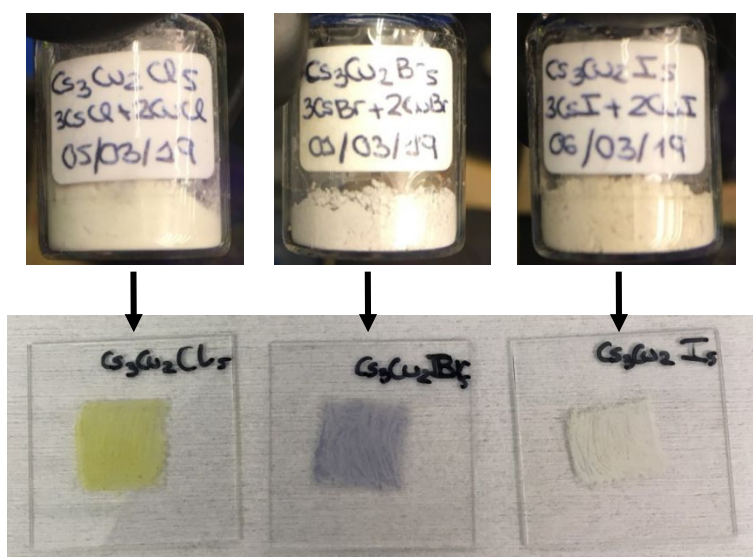

**Figure S 21.** Comparison of the colour of the powders for  $\text{Cs}_3\text{Cu}_2\text{X}_5$  when they are kept inside a nitrogen filled glovebox (up) and when they are exposed to air and moisture for 24h (down).

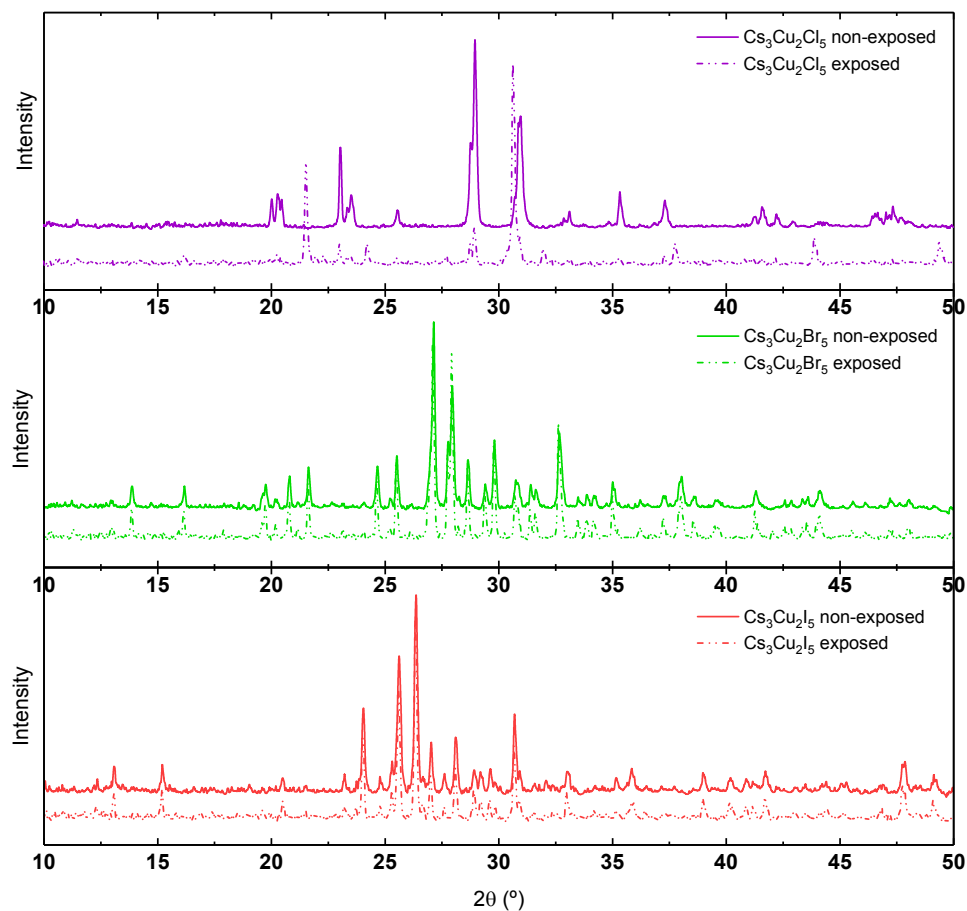

**Figure S 22.** XRD of the as-prepared powders from ball milling synthesis for pure-halide  $\text{Cs}_3\text{Cu}_2\text{X}_5$  compounds. Non-exposed to air powders are presented with a straight line and the exposed ones, with a dashed line.

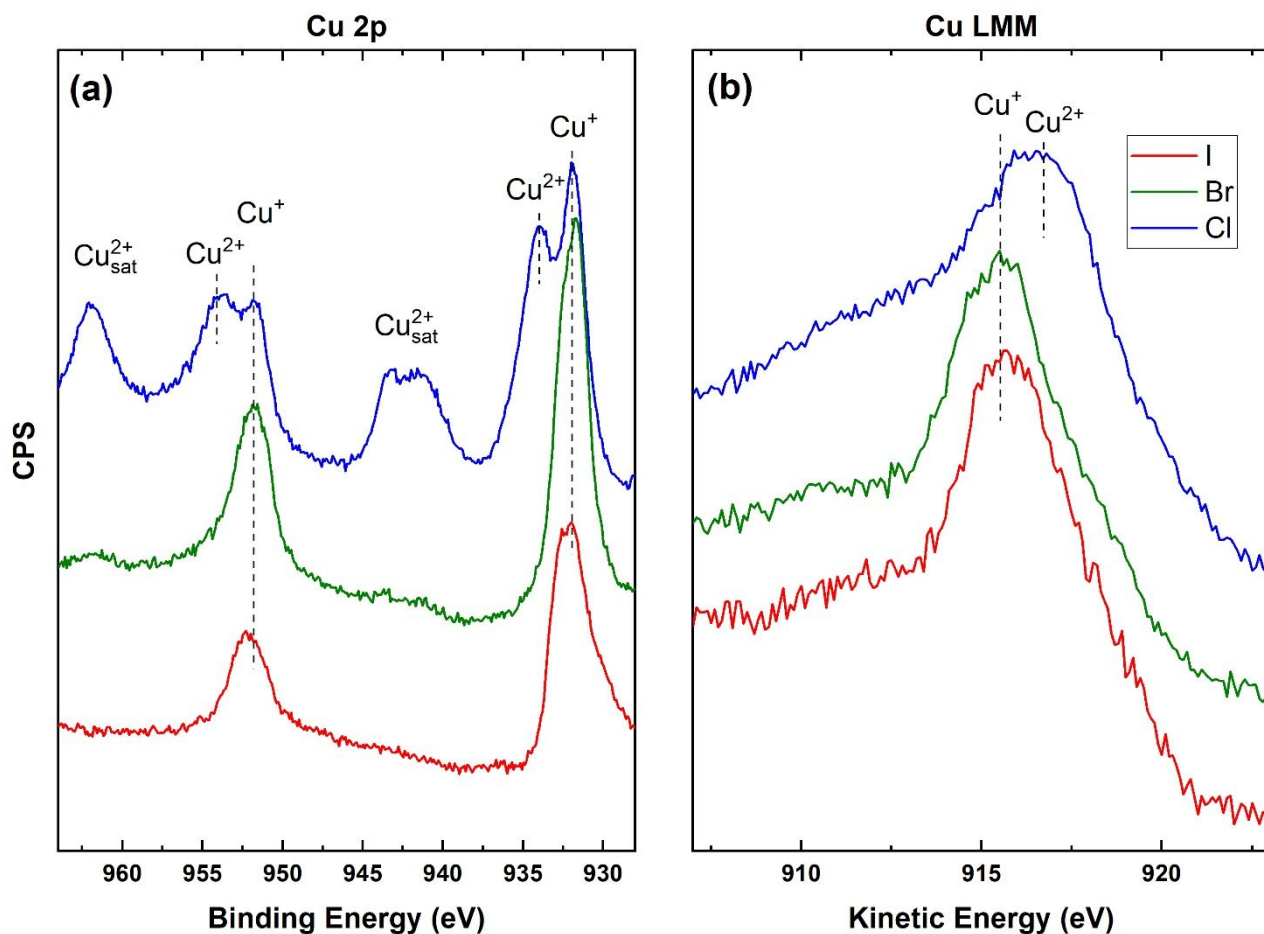

**Figure S 23.** XPS (a) and XAES (b) characterization of  $\text{Cs}_3\text{Cu}_2\text{X}_5$  (X=Cl, Br, and I). Clear indications of  $\text{Cu(II)}$  exist in the  $\text{Cs}_3\text{Cu}_2\text{Cl}_5$  sample, demonstrating its lower stability in air.

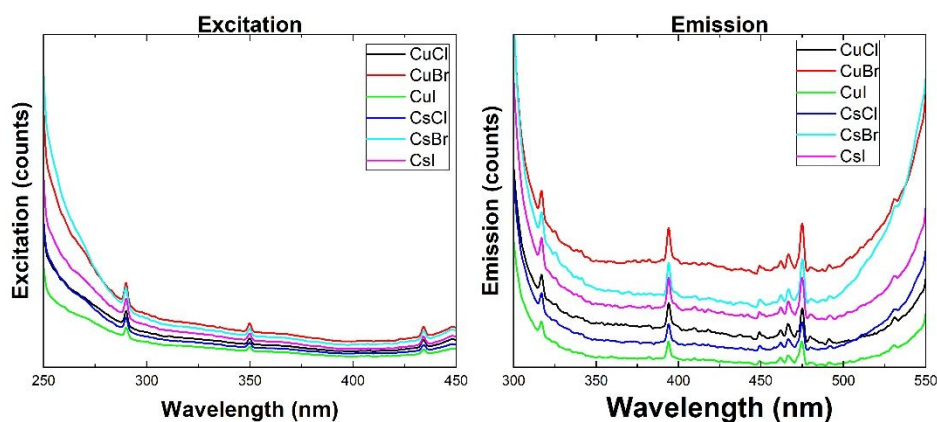

**Figure S 24.** Excitation and emission spectra of starting reagents. Excitation spectra are acquired for an emission at 475 nm, while emission spectra are acquired with an excitation set at 290 nm. No significant PL is observed from the different chemicals in these conditions. Low-intensity, sample-independent features are attributed to the instrument. The “tails” at the lower and higher wavelengths represented here are due to the excitation source itself (first and second harmonic).

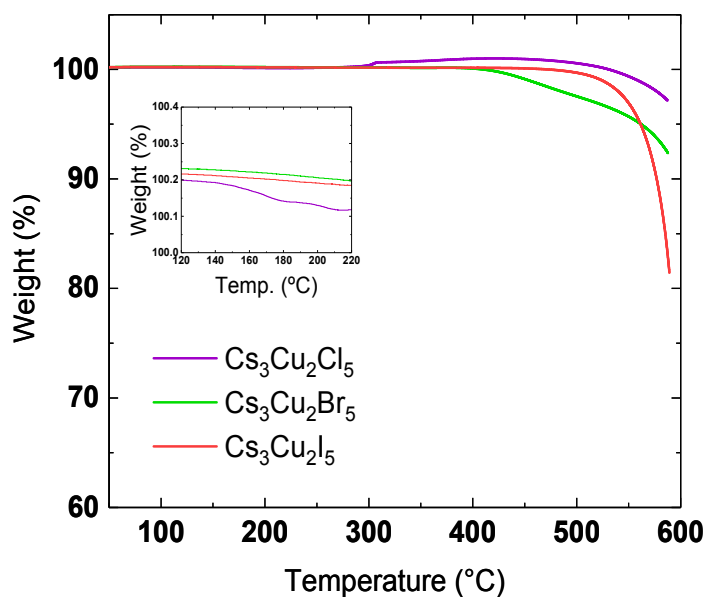

**Figure S 25.** Thermogravimetric analysis (TGA) of the pure-halide  $\text{Cs}_3\text{Cu}_2\text{X}_5$  compounds when they are kept inside a nitrogen filled glovebox. A special zoom is presented in the zone of first weight loss for chloride compound, which could correspond with the formation of  $\text{Cu}_2\text{O}$ .

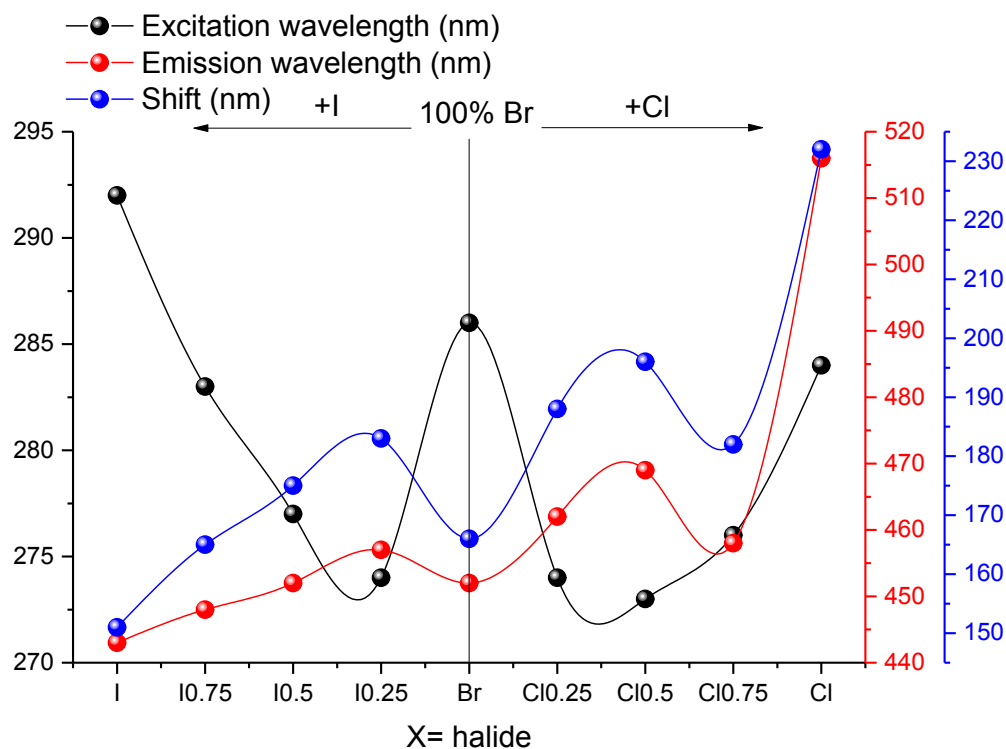

**Figure S 26.** Variation in the emission (red) and excitation (black) wavelength trend for all the species synthesized of  $\text{Cs}_3\text{Cu}_2\text{X}_5$  structure (non-exposed powders). In blue in shown the difference between emission and excitation wavelengths.

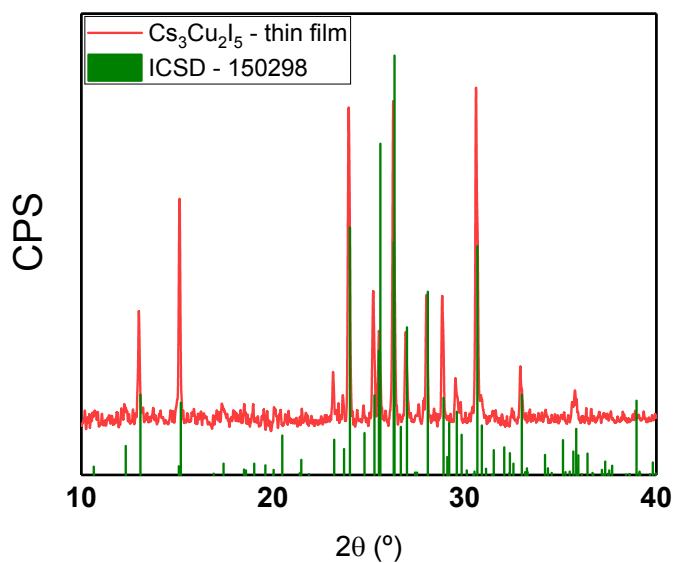

**Figure S 27.** XRD of the thin-films by solution processes of ball-milled powders of  $\text{Cs}_3\text{Cu}_2\text{I}_5$  (red line) and its reference bulk pattern from the Inorganic Crystal Structure Database (ICSD) (green columns).

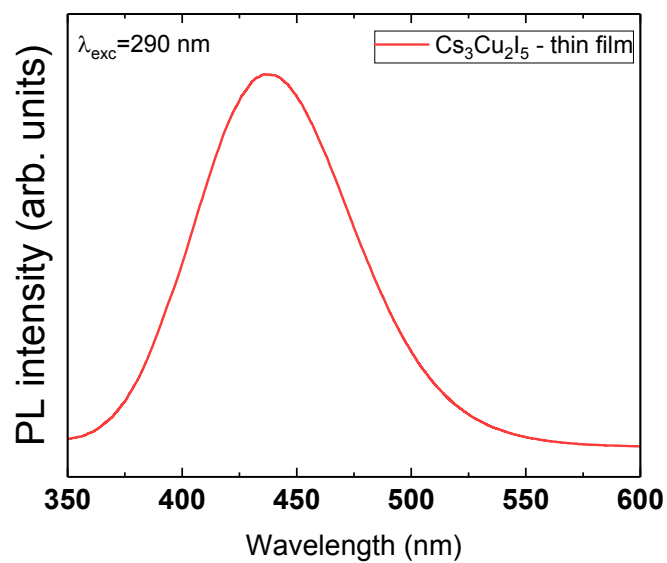

**Figure S 28.** Photoluminescence spectra of thin-films by solution processing of  $\text{Cs}_3\text{Cu}_2\text{I}_5$ .

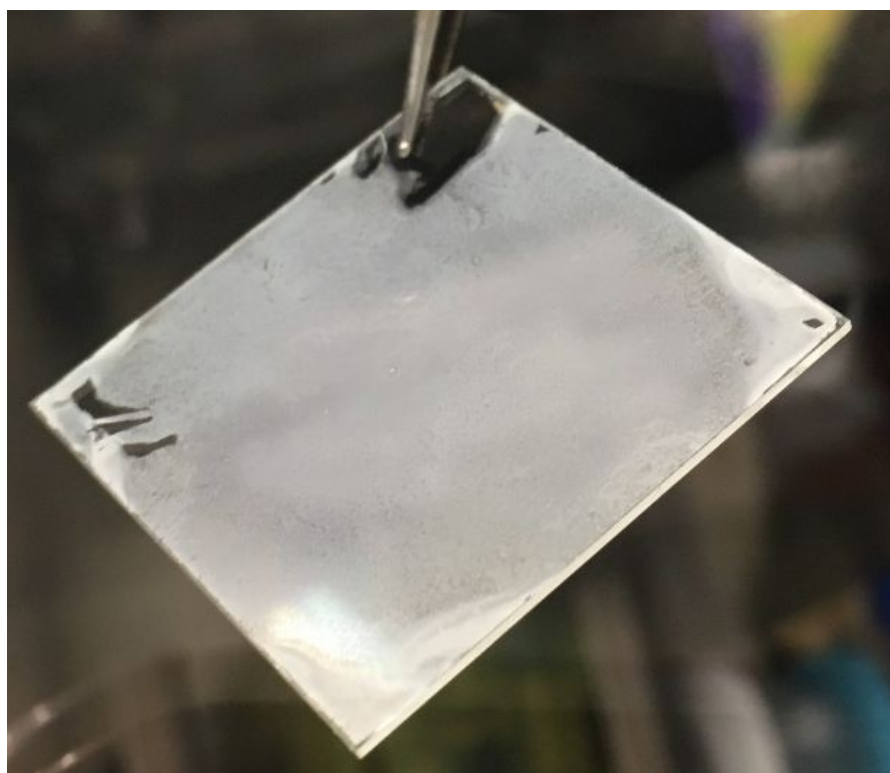

**Figure S 29.** Photograph of spin-coated  $\text{Cs}_3\text{Cu}_2\text{I}_5$  film showing obvious inhomogeneities. Substrate is 3x3 cm.

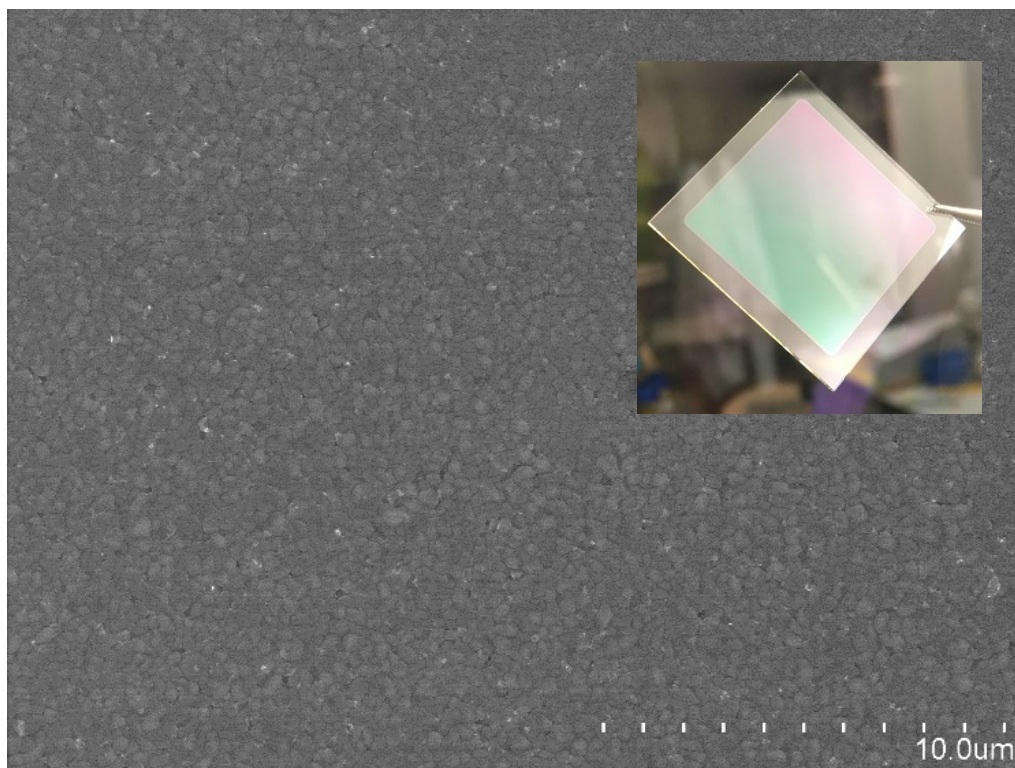

**Figure S 30.** SEM image and photograph (inset) of SSVD-film of  $\text{Cs}_3\text{Cu}_2\text{I}_5$  showing good homogeneity.

## SUPPLEMENTARY REFERENCES:

- (1) Le Bail, A. Whole Powder Pattern Decomposition Methods and Applications: A Retrospection. *Powder Diffr.* **2005**, *20* (4), 316–326.
- (2) Thompson, P., Cox, D.E., Hasting, J. B. Rietveld Refinement of Deybe-Scherrer Synchrotron X-Ray Data from Al<sub>2</sub>O<sub>3</sub>. *Jorunal Apply Crystallogr.* **1987**, *20*, 79–83.
